# Supplementary material for: Scenario-Based Land Use and Land Cover Change Detection and Prediction Using the Cellular Automata–Markov Model in the Gumara Watershed, Upper Blue Nile Basin, Ethiopia
Source: MDPI journal article supplement (doi:10.3390/land13030396), 2024-03-20

## Supplementary materials

S1: Total number of training and validation points

| LULC class      | Year |      |      |      |
|-----------------|------|------|------|------|
|                 | 1985 | 2000 | 2010 | 2019 |
| Forest          | 187  | 217  | 293  | 410  |
| Shrubland       | 343  | 270  | 300  | 383  |
| Grassland       | 337  | 643  | 960  | 663  |
| cultivated land | 750  | 973  | 1107 | 1063 |
| Settlement      | 167  | 157  | 250  | 410  |

## S2: Confusion matrix

S2a: Confusion matrix for 1985

| LULC class                   | Forest | Shrubland | Grassland | cultivated land | Settlement | Row total (RT) | User accuracy (UA) (%) | RT/Total |
|------------------------------|--------|-----------|-----------|-----------------|------------|----------------|------------------------|----------|
| Forest                       | 53     | 13        | 0         | 1               | 0          | 67             | 79.10                  | 0.1252   |
| Shrubland                    | 1      | 88        | 0         | 4               | 0          | 93             | 94.62                  | 0.1738   |
| Grassland                    | 2      | 0         | 100       | 3               | 0          | 105            | 95.24                  | 0.1963   |
| cultivated land              | 0      | 2         | 1         | 216             | 2          | 221            | 97.74                  | 0.4131   |
| Settlement                   | 0      | 0         | 0         | 1               | 48         | 49             | 97.96                  | 0.0916   |
| Column total (CT)            | 56     | 103       | 101       | 225             | 50         | 535            |                        |          |
| Producer accuracy (PA) (%)   | 94.64  | 85.44     | 99.01     | 96.00           | 96.00      |                |                        |          |
| CT/Total                     | 0.1047 | 0.1925    | 0.1888    | 0.4206          | 0.0935     |                |                        |          |
| Sum of (CT/Total)*(RT/Total) | 0.2659 |           |           |                 |            |                |                        |          |
| Overall accuracy (OA)        | 0.9439 |           |           |                 | 94.39      |                |                        |          |
| Kappa (K)                    | 0.9236 |           |           |                 |            |                |                        |          |

S2b: Confusion matrix for 2000

| LULC class                   | Forest | Shrubland                 | Grassland | cultivated land | Settlement | Row total (RT) | User accuracy (UA) (%) | RT/Total |
|------------------------------|--------|---------------------------|-----------|-----------------|------------|----------------|------------------------|----------|
| Forest                       | 65     | 0                         | 0         | 0               | 0          | 65             | 100.00                 | 0.0959   |
| Shrubland                    | 0      | 79                        | 0         | 6               | 0          | 85             | 92.94                  | 0.1254   |
| Grassland                    | 0      | 1                         | 182       | 13              | 0          | 196            | 92.86                  | 0.2891   |
| cultivated land              | 0      | 1                         | 11        | 270             | 0          | 282            | 95.74                  | 0.4159   |
| Settlement                   | 0      | 0                         | 0         | 3               | 47         | 50             | 94.00                  | 0.0737   |
| Column total (CT)            | 65     | 81                        | 193       | 292             | 47         | 678            |                        |          |
| Producer accuracy (PA) (%)   | 100.00 | 97.53                     | 94.30     | 92.47           | 100.00     |                |                        |          |
| CT/Total                     | 0.0959 | 0.1195                    | 0.2847    | 0.4307          | 0.0693     |                |                        |          |
| Sum of (CT/Total)*(RT/Total) | 0.2907 |                           |           |                 |            |                |                        |          |
| Overall accuracy (OA)        | 0.9484 | Overall accuracy (OA) (%) |           |                 | 94.84      |                |                        |          |
| Kappa coefficient (K)        | 0.9400 |                           |           |                 |            |                |                        |          |

S2c: Confusion matrix for 2010

| LULC class                   | Forest | Shrubland                 | Grassland | cultivated land | Settlement | Row total (RT) | User accuracy (UA) (%) | RT/Total |
|------------------------------|--------|---------------------------|-----------|-----------------|------------|----------------|------------------------|----------|
| Forest                       | 88     | 0                         | 0         | 0               | 0          | 88             | 100.00                 | 0.1008   |
| Shrubland                    | 0      | 89                        | 0         | 10              | 0          | 99             | 89.90                  | 0.1134   |
| Grassland                    | 0      | 0                         | 277       | 32              | 0          | 309            | 89.64                  | 0.3540   |
| cultivated land              | 0      | 1                         | 11        | 285             | 1          | 298            | 95.64                  | 0.3414   |
| Settlement                   | 0      | 0                         | 0         | 5               | 74         | 79             | 93.67                  | 0.0905   |
| Column total (CT)            | 88     | 90                        | 288       | 332             | 75         | 873            |                        |          |
| Producer accuracy (PA) (%)   | 100.00 | 98.89                     | 96.18     | 85.84           | 98.67      |                |                        |          |
| CT/Total                     | 0.1008 | 0.1031                    | 0.3299    | 0.3803          | 0.0859     |                |                        |          |
| Sum of (CT/Total)*(RT/Total) | 0.2762 |                           |           |                 |            |                |                        |          |
| Overall accuracy (OA)        | 0.9313 | Overall accuracy (OA) (%) |           |                 | 93.13      |                |                        |          |
| Kappa coefficient (K)        | 0.9050 |                           |           |                 |            |                |                        |          |

S2d: Confusion matrix for 2019

| LULC class                   | Forest | Shrubland                 | Grassland | cultivated land | Settlement | Row total (RT) | User accuracy (UA) (%) | RT/Total |
|------------------------------|--------|---------------------------|-----------|-----------------|------------|----------------|------------------------|----------|
| Forest                       | 119    | 15                        | 0         | 0               | 0          | 134            | 88.81                  | 0.1524   |
| Shrubland                    | 4      | 97                        | 0         | 10              | 0          | 111            | 87.39                  | 0.1263   |
| Grassland                    | 0      | 1                         | 168       | 2               | 0          | 171            | 98.25                  | 0.1945   |
| cultivated land              | 0      | 2                         | 30        | 297             | 3          | 332            | 89.46                  | 0.3777   |
| Settlement                   | 0      | 0                         | 1         | 10              | 120        | 131            | 91.60                  | 0.1490   |
| Column total (CT)            | 123    | 115                       | 199       | 319             | 123        | 879            |                        |          |
| Producer accuracy (PA) (%)   | 96.75  | 84.35                     | 84.42     | 93.10           | 97.56      |                |                        |          |
| CT/Total                     | 0.1399 | 0.1308                    | 0.2264    | 0.3629          | 0.1399     |                |                        |          |
| Sum of (CT/Total)*(RT/Total) | 0.2398 |                           |           |                 |            |                |                        |          |
| Overall accuracy (OA)        | 0.9113 | Overall accuracy (OA) (%) |           |                 | 91.13      |                |                        |          |
| Kappa coefficient (K)        | 0.8833 |                           |           |                 |            |                |                        |          |

### S3: Transition potential maps (2010-2019)

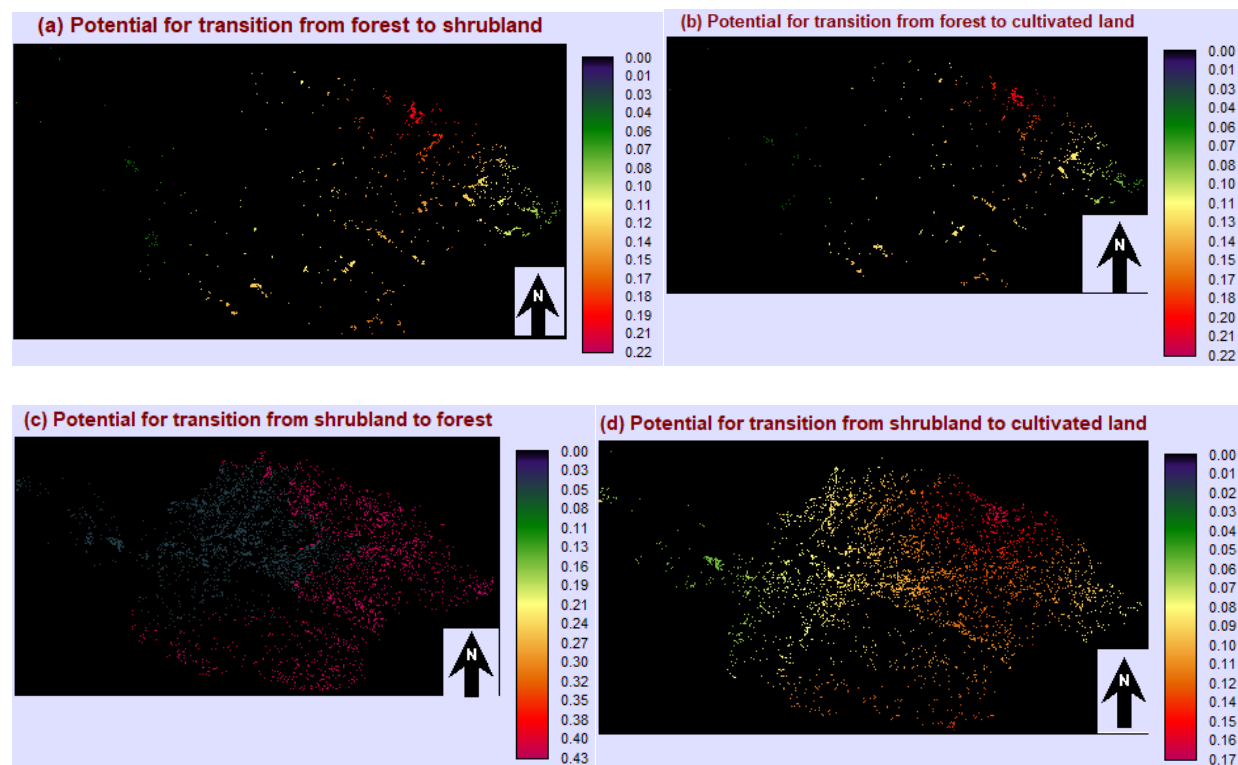

(e) Potential for transition from grassland to cultivated land

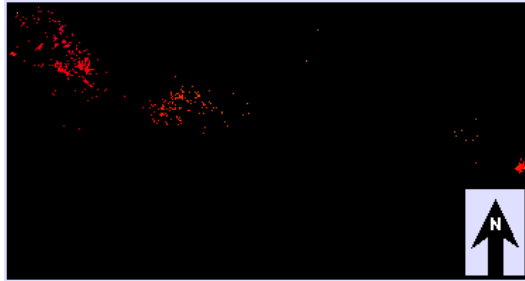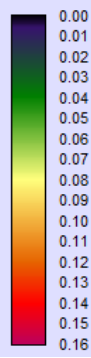

(f) Potential for transition from cultivated land to settlement

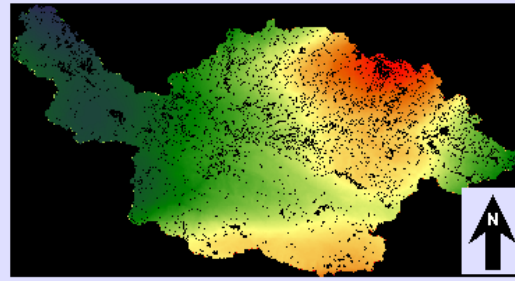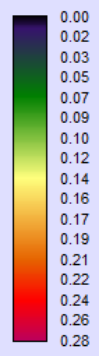

Supplement: s1 [file s1]
